# Supplementary material for: Artículo 54 del Convenio Schengen y proceso de extradición: a propósito del auto de la Audiencia Nacional de 14 de enero de 2013 y el concepto de cosa juzgada europea (1)
Source: MDPI journal article supplement (doi:10.3390/jof9121157), 2013-01-01
Supplement: s1 [file s1]

## Supplementary Materials

**Table S1.** The 303 diverse maize inbred lines were evaluated for GER severity at 7, 14, 21 and 28 days post-inoculation (dpi) using kernel bioassay.

| Material name | 7 DPI ( $\times 10^5$ ) | 14 DPI ( $\times 10^5$ ) | 21 DPI ( $\times 10^5$ ) | 28 DPI ( $\times 10^5$ ) | Mean ( $\times 10^5$ ) |
|---------------|-------------------------|--------------------------|--------------------------|--------------------------|------------------------|
| SCML1950      | 0.41                    | 0.43                     | 0.52                     | 0.56                     | 0.48                   |
| Qi533         | 0.53                    | 0.81                     | 0.58                     | 0.17                     | 0.52                   |
| JD7275        | 0.75                    | 0.82                     | 0.65                     | 0.73                     | 0.74                   |
| End28         | 0.46                    | 1.52                     | 0.45                     | 0.79                     | 0.81                   |
| 5Gong         | 0.32                    | 0.97                     | 0.76                     | 1.26                     | 0.83                   |
| CG698C102     | 0.12                    | 1.15                     | 1.67                     | 1.80                     | 1.19                   |
| Su95-1        | 0.19                    | 0.82                     | 1.74                     | 2.38                     | 1.28                   |
| Lin-1         | 0.78                    | 1.59                     | 1.47                     | 1.52                     | 1.34                   |
| CLWN251       | 0.56                    | 0.86                     | 1.54                     | 2.67                     | 1.41                   |
| BJ005         | 0.47                    | 0.33                     | 2.32                     | 2.69                     | 1.45                   |
| LZM009        | 1.22                    | 0.95                     | 1.41                     | 2.46                     | 1.51                   |
| CLYN223       | 0.44                    | 2.41                     | 1.68                     | 1.53                     | 1.52                   |
| Nan637        | 0.34                    | 0.27                     | 4.13                     | 1.42                     | 1.54                   |
| Lu2458        | 0.00                    | 0.38                     | 4.82                     | 1.23                     | 1.61                   |
| SW01D1058-5   | 0.54                    | 4.10                     | 2.18                     | 0.00                     | 1.71                   |
| CMY093288     | 0.47                    | 1.48                     | 2.15                     | 2.72                     | 1.71                   |
| XBY13563      | 0.45                    | 3.23                     | 0.36                     | 3.39                     | 1.86                   |
| XH05          | 0.27                    | 0.59                     | 6.91                     | 0.48                     | 2.06                   |
| CG921         | 2.81                    | 0.37                     | 0.95                     | 4.32                     | 2.11                   |
| M232          | 0.81                    | 0.93                     | 2.16                     | 4.58                     | 2.12                   |
| 08WSC187      | 0.24                    | 3.35                     | 0.87                     | 4.14                     | 2.15                   |
| NZ013-1       | 0.00                    | 8.89                     | 0.00                     | 0.00                     | 2.22                   |
| CL02603       | 0.00                    | 1.47                     | 3.78                     | 4.02                     | 2.32                   |
| GP30-1        | 0.00                    | 0.22                     | 2.17                     | 7.12                     | 2.38                   |
| 06WAM210      | 0.00                    | 0.67                     | 0.34                     | 9.13                     | 2.54                   |
| CLWN247       | 0.00                    | 0.56                     | 4.15                     | 5.55                     | 2.57                   |
| CL02720       | 0.00                    | 0.00                     | 9.67                     | 0.65                     | 2.58                   |
| Zheng28       | 0.26                    | 1.83                     | 0.37                     | 8.11                     | 2.64                   |
| CML308        | 0.24                    | 3.51                     | 6.31                     | 0.58                     | 2.66                   |
| Qi205         | 0.28                    | 0.37                     | 0.96                     | 9.97                     | 2.90                   |
| Dan3130       | 0.47                    | 3.98                     | 0.62                     | 6.53                     | 2.90                   |
| LX9801        | 0.32                    | 0.47                     | 0.23                     | 10.60                    | 2.91                   |
| 08WSC51       | 0.65                    | 0.33                     | 8.76                     | 2.14                     | 2.97                   |
| CLWN250       | 0.44                    | 1.55                     | 7.85                     | 2.56                     | 3.10                   |
| ZP2012        | 1.48                    | 1.26                     | 0.36                     | 9.85                     | 3.24                   |
| HL5049        | 8.13                    | 5.12                     | 0.00                     | 0.00                     | 3.31                   |
| 08WSC204      | 1.44                    | 10.94                    | 1.46                     | 0.00                     | 3.46                   |
| Y1027         | 0.92                    | 3.35                     | 8.58                     | 1.56                     | 3.60                   |
| Y1021         | 9.09                    | 1.54                     | 2.16                     | 2.14                     | 3.73                   |
| YA3237        | 4.46                    | 2.56                     | 0.26                     | 8.22                     | 3.88                   |
| 141           | 3.45                    | 1.24                     | 3.35                     | 7.50                     | 3.89                   |
| 7141_5        | 0.95                    | 1.81                     | 13.58                    | 0.66                     | 4.25                   |
| K169R         | 0.65                    | 14.30                    | 0.43                     | 2.44                     | 4.46                   |

|             |       |       |       |       |       |
|-------------|-------|-------|-------|-------|-------|
| 10WRB115    | 13.20 | 0.94  | 2.74  | 1.55  | 4.61  |
| M14         | 7.84  | 2.45  | 4.52  | 3.75  | 4.64  |
| JY01-3      | 0.25  | 15.30 | 1.25  | 2.07  | 4.72  |
| Y8G         | 0.00  | 8.24  | 7.15  | 3.78  | 4.79  |
| H10         | 0.00  | 17.56 | 2.47  | 0.25  | 5.07  |
| L2010-3     | 1.41  | 4.81  | 2.15  | 12.46 | 5.21  |
| 646         | 1.58  | 16.59 | 1.84  | 0.87  | 5.22  |
| Mian7317    | 1.90  | 3.34  | 12.27 | 4.55  | 5.52  |
| BS08-565    | 0.00  | 0.95  | 15.60 | 5.75  | 5.58  |
| Liao2379    | 1.45  | 5.15  | 4.25  | 11.78 | 5.66  |
| 2142        | 0.00  | 0.16  | 6.13  | 16.65 | 5.74  |
| Mian723     | 7.45  | 10.35 | 2.75  | 2.55  | 5.78  |
| PN0504-8    | 0.26  | 5.47  | 5.75  | 12.23 | 5.93  |
| 98009       | 0.00  | 0.32  | 4.78  | 19.12 | 6.06  |
| Mian04185-4 | 1.78  | 5.17  | 7.42  | 10.55 | 6.23  |
| PI43W       | 0.47  | 1.26  | 11.61 | 12.55 | 6.47  |
| K102        | 2.16  | 8.32  | 3.35  | 12.71 | 6.64  |
| 434         | 0.48  | 0.38  | 6.34  | 19.54 | 6.69  |
| 1212638     | 0.00  | 0.00  | 13.53 | 14.17 | 6.93  |
| Dong156     | 0.00  | 3.67  | 12.54 | 12.72 | 7.23  |
| CG921       | 0.65  | 12.32 | 13.51 | 2.76  | 7.31  |
| K22         | 1.19  | 2.25  | 1.87  | 24.59 | 7.48  |
| Zheng99     | 6.47  | 9.17  | 6.79  | 7.56  | 7.50  |
| M3-0        | 3.23  | 12.59 | 10.57 | 3.61  | 7.50  |
| JH96B       | 1.86  | 6.35  | 10.15 | 12.28 | 7.66  |
| Mian04185-8 | 3.37  | 1.86  | 21.93 | 4.57  | 7.93  |
| KS001       | 1.85  | 22.23 | 6.93  | 1.39  | 8.10  |
| TD1         | 1.45  | 24.80 | 3.96  | 3.55  | 8.44  |
| 7854        | 0.36  | 7.72  | 3.58  | 22.15 | 8.45  |
| SCML2031    | 0.25  | 1.53  | 2.11  | 30.05 | 8.49  |
| TL96B       | 0.00  | 1.56  | 0.39  | 32.25 | 8.55  |
| M11         | 0.00  | 0.35  | 27.67 | 7.81  | 8.96  |
| Y0827       | 4.69  | 3.69  | 1.25  | 26.92 | 9.14  |
| Y1035       | 2.14  | 10.17 | 7.81  | 16.54 | 9.17  |
| YS0         | 2.14  | 4.56  | 13.58 | 16.59 | 9.22  |
| Dan340      | 6.23  | 4.27  | 9.98  | 16.52 | 9.25  |
| 81565       | 1.26  | 10.81 | 3.38  | 21.78 | 9.31  |
| 18-9-101    | 0.86  | 5.41  | 10.18 | 21.45 | 9.48  |
| M165        | 10.43 | 3.96  | 5.75  | 18.72 | 9.72  |
| GCML152     | 1.66  | 2.47  | 6.38  | 28.98 | 9.87  |
| 65232B      | 0.23  | 8.71  | 18.65 | 12.21 | 9.95  |
| 975-12      | 0.26  | 0.29  | 1.80  | 37.54 | 9.97  |
| CLWN227     | 0.23  | 37.51 | 0.39  | 2.47  | 10.15 |
| Su1611      | 2.81  | 3.64  | 7.52  | 27.87 | 10.46 |
| 9614        | 5.66  | 4.12  | 24.68 | 7.59  | 10.51 |
| Nan202      | 4.15  | 10.55 | 25.57 | 1.87  | 10.54 |
| Y1015       | 1.53  | 4.59  | 28.51 | 7.61  | 10.56 |
| W7475       | 0.41  | 0.36  | 40.50 | 1.23  | 10.63 |
| 793         | 3.17  | 12.14 | 12.45 | 16.25 | 11.00 |

|              |       |       |       |       |       |
|--------------|-------|-------|-------|-------|-------|
| CLWN205      | 11.19 | 1.02  | 9.03  | 23.04 | 11.07 |
| Nan09530     | 13.60 | 1.35  | 13.25 | 16.14 | 11.09 |
| ML1108       | 6.18  | 5.17  | 13.28 | 20.05 | 11.17 |
| 10GY6057     | 3.36  | 0.96  | 7.58  | 33.16 | 11.27 |
| Qi319        | 7.24  | 1.58  | 6.15  | 30.23 | 11.30 |
| GD003        | 0.47  | 25.23 | 10.05 | 10.08 | 11.46 |
| 08WSC257     | 2.26  | 1.86  | 21.08 | 21.12 | 11.58 |
| BML1228      | 18.12 | 7.85  | 18.80 | 2.01  | 11.70 |
| DH3732       | 1.24  | 31.09 | 5.14  | 9.67  | 11.79 |
| BML1269      | 6.43  | 4.16  | 2.01  | 35.01 | 11.90 |
| Dan598       | 3.62  | 8.84  | 22.54 | 12.78 | 11.95 |
| Du321        | 1.04  | 10.27 | 1.35  | 37.05 | 12.43 |
| SW01D1058-2  | 0.80  | 9.30  | 0.30  | 40.00 | 12.60 |
| 510317       | 0.47  | 1.88  | 0.65  | 47.58 | 12.65 |
| KS003        | 0.26  | 1.64  | 14.19 | 34.53 | 12.66 |
| CML291       | 0.43  | 7.22  | 2.77  | 40.46 | 12.72 |
| CLWN226      | 6.04  | 0.62  | 2.01  | 42.51 | 12.80 |
| K305         | 7.10  | 16.55 | 15.13 | 12.68 | 12.87 |
| S273         | 6.12  | 18.34 | 4.56  | 22.57 | 12.90 |
| 21209        | 3.23  | 27.55 | 2.73  | 18.26 | 12.94 |
| LS-22        | 2.83  | 22.54 | 5.16  | 22.57 | 13.28 |
| Y1127        | 0.84  | 9.09  | 3.96  | 40.12 | 13.50 |
| LH7556       | 3.84  | 7.57  | 10.22 | 32.53 | 13.54 |
| 9LB050       | 2.84  | 28.51 | 13.22 | 10.58 | 13.79 |
| QA           | 0.23  | 37.56 | 15.37 | 3.12  | 14.07 |
| L31          | 0.00  | 34.15 | 15.96 | 7.89  | 14.50 |
| TL98A1709-20 | 0.27  | 21.03 | 0.67  | 37.05 | 14.76 |
| Zheng22      | 27.19 | 2.11  | 28.54 | 1.32  | 14.79 |
| ZY2247       | 0.49  | 4.03  | 50.12 | 4.57  | 14.80 |
| Zheng29      | 12.27 | 15.09 | 10.05 | 22.59 | 15.00 |
| Yu561        | 1.56  | 13.57 | 42.14 | 3.06  | 15.08 |
| LZM025       | 1.46  | 2.83  | 21.57 | 34.58 | 15.11 |
| CLYN214      | 4.02  | 22.38 | 16.05 | 18.27 | 15.18 |
| Shen137      | 0.00  | 0.00  | 0.48  | 60.36 | 15.21 |
| LC955        | 1.53  | 24.06 | 34.57 | 1.11  | 15.32 |
| Yu9537       | 0.44  | 24.37 | 4.28  | 32.18 | 15.32 |
| 09YT20919    | 4.46  | 15.26 | 28.51 | 13.53 | 15.44 |
| SCML203      | 6.08  | 13.02 | 27.35 | 16.05 | 15.63 |
| Nan21-3      | 3.17  | 40.56 | 10.26 | 9.03  | 15.76 |
| 18-599       | 0.41  | 1.24  | 31.56 | 31.57 | 16.20 |
| Shen136      | 0.25  | 2.75  | 45.91 | 16.15 | 16.27 |
| 178          | 0.65  | 14.74 | 42.64 | 7.62  | 16.41 |
| C2010-3      | 2.61  | 46.51 | 17.76 | 0.37  | 16.81 |
| BANTAN2003   | 0.25  | 27.36 | 27.57 | 13.59 | 17.19 |
| PHW65        | 1.82  | 3.22  | 31.56 | 32.57 | 17.29 |
| De12         | 10.15 | 31.58 | 22.51 | 6.06  | 17.58 |
| SCML2054     | 3.84  | 30.74 | 10.05 | 27.09 | 17.93 |
| 10GY76-111   | 2.87  | 1.28  | 10.52 | 57.46 | 18.03 |
| Y0826        | 18.16 | 36.23 | 7.05  | 12.06 | 18.38 |

|           |       |       |        |       |       |
|-----------|-------|-------|--------|-------|-------|
| ZYDH381-1 | 18.37 | 20.37 | 30.23  | 5.13  | 18.53 |
| B73       | 1.25  | 16.12 | 18.07  | 39.09 | 18.63 |
| W8034     | 28.16 | 12.37 | 21.03  | 13.01 | 18.64 |
| LSC107    | 0.24  | 13.15 | 28.15  | 33.41 | 18.74 |
| Y1224     | 6.02  | 33.32 | 34.05  | 2.52  | 18.98 |
| GCML57    | 16.03 | 34.05 | 14.07  | 12.23 | 19.10 |
| Ji477     | 2.25  | 18.16 | 48.03  | 8.01  | 19.11 |
| LSC127    | 0.27  | 0.86  | 30.01  | 45.34 | 19.12 |
| BML1243   | 4.88  | 12.07 | 57.17  | 2.55  | 19.17 |
| C24       | 3.76  | 7.38  | 10.55  | 55.58 | 19.32 |
| CA211     | 1.55  | 3.16  | 6.39   | 67.72 | 19.71 |
| CML379    | 4.04  | 9.09  | 27.12  | 40.05 | 20.08 |
| PH4CV     | 1.02  | 6.25  | 21.18  | 52.04 | 20.12 |
| 5311      | 0.83  | 3.33  | 52.56  | 24.05 | 20.19 |
| BML1275   | 0.00  | 0.37  | 75.62  | 5.72  | 20.43 |
| LH8012    | 0.00  | 0.00  | 3.33   | 80.21 | 20.89 |
| XBY2193   | 0.45  | 2.72  | 10.81  | 70.07 | 21.01 |
| 77        | 0.25  | 15.89 | 6.67   | 61.58 | 21.10 |
| Ji1037    | 0.27  | 3.34  | 14.17  | 70.01 | 21.95 |
| 08WSC237  | 2.16  | 1.88  | 51.20  | 33.17 | 22.10 |
| DH29      | 40.11 | 1.05  | 11.11  | 36.23 | 22.13 |
| LX350     | 3.14  | 45.23 | 37.52  | 6.35  | 23.06 |
| 78599-211 | 50.24 | 6.18  | 33.09  | 3.06  | 23.14 |
| LM-6      | 1.84  | 60.28 | 25.57  | 5.44  | 23.28 |
| H127RE    | 1.44  | 0.66  | 27.17  | 68.27 | 24.39 |
| LX312     | 1.96  | 3.65  | 3.03   | 90.58 | 24.81 |
| 21A       | 0.22  | 18.37 | 11.01  | 69.85 | 24.86 |
| C09-1     | 28.34 | 1.28  | 21.28  | 49.57 | 25.12 |
| YA8201    | 7.25  | 28.16 | 60.18  | 5.05  | 25.16 |
| W8199     | 3.12  | 10.15 | 15.02  | 74.37 | 25.67 |
| 698-3     | 4.63  | 67.57 | 1.59   | 30.92 | 26.18 |
| GP66-1    | 12.59 | 25.55 | 0.93   | 65.73 | 26.20 |
| Liao6082  | 0.43  | 0.62  | 51.95  | 52.53 | 26.38 |
| CTL26     | 0.64  | 11.76 | 78.26  | 16.56 | 26.81 |
| ShuangM9  | 1.27  | 27.02 | 30.74  | 49.15 | 27.05 |
| ZJ-3      | 0.44  | 36.63 | 58.05  | 15.84 | 27.74 |
| 1217 8107 | 2.53  | 42.93 | 27.36  | 40.05 | 28.22 |
| Mian715   | 10.05 | 20.16 | 36.37  | 48.36 | 28.74 |
| 4011      | 51.83 | 57.73 | 2.15   | 4.28  | 29.00 |
| K363      | 3.66  | 4.58  | 19.53  | 88.84 | 29.15 |
| SAM3001   | 22.05 | 25.55 | 40.52  | 28.57 | 29.17 |
| 1323      | 5.28  | 3.92  | 46.55  | 61.52 | 29.32 |
| Dan599    | 1.18  | 13.05 | 93.94  | 9.81  | 29.50 |
| 811       | 4.84  | 2.26  | 15.58  | 96.06 | 29.69 |
| LJS-1     | 5.41  | 21.19 | 43.51  | 49.54 | 29.91 |
| SCML202   | 57.28 | 40.55 | 2.04   | 20.36 | 30.06 |
| PHV63     | 15.73 | 6.37  | 100.29 | 0.44  | 30.71 |
| TY30331-3 | 36.16 | 33.38 | 36.47  | 17.56 | 30.89 |
| ZD808-1   | 1.65  | 28.58 | 6.12   | 88.05 | 31.10 |

|             |       |        |        |        |       |
|-------------|-------|--------|--------|--------|-------|
| Y0921       | 0.23  | 1.28   | 5.72   | 120.36 | 31.90 |
| Liao68      | 1.47  | 1.84   | 7.57   | 117.53 | 32.10 |
| P801        | 0.65  | 10.08  | 36.34  | 82.56  | 32.41 |
| XS021       | 0.00  | 0.23   | 22.85  | 107.52 | 32.65 |
| H08-155     | 1.27  | 21.95  | 43.05  | 64.51  | 32.70 |
| SH15        | 1.23  | 90.59  | 2.48   | 39.13  | 33.36 |
| W284        | 3.16  | 7.52   | 13.56  | 110.01 | 33.56 |
| Lian87      | 0.82  | 16.48  | 108.05 | 11.14  | 34.12 |
| 17564       | 0.23  | 1.65   | 32.88  | 102.54 | 34.33 |
| GCML140     | 2.38  | 13.29  | 86.63  | 35.63  | 34.48 |
| LZM004      | 38.84 | 20.41  | 18.15  | 60.74  | 34.54 |
| Liao7996    | 6.20  | 5.16   | 22.05  | 105.94 | 34.84 |
| 10GY92-121  | 1.64  | 4.82   | 12.21  | 120.73 | 34.85 |
| SN8-1-1     | 12.37 | 15.16  | 110.37 | 4.05   | 35.49 |
| S7913       | 1.22  | 30.67  | 13.02  | 100.45 | 36.34 |
| LN8         | 0.69  | 31.42  | 112.82 | 4.63   | 37.39 |
| 7327        | 18.15 | 12.26  | 88.05  | 32.35  | 37.70 |
| 1572        | 4.21  | 24.35  | 51.54  | 76.53  | 39.16 |
| Wa138       | 0.12  | 4.54   | 85.57  | 66.56  | 39.20 |
| 975-13      | 0.00  | 0.00   | 19.05  | 138.07 | 39.28 |
| Liao7890    | 1.63  | 0.98   | 0.32   | 155.46 | 39.60 |
| Ye478       | 2.64  | 10.85  | 76.32  | 70.27  | 40.02 |
| 10WRC64     | 0.68  | 5.72   | 13.25  | 140.54 | 40.05 |
| Y1005       | 4.24  | 50.47  | 60.46  | 47.39  | 40.64 |
| U8112       | 0.00  | 57.14  | 106.05 | 0.53   | 40.93 |
| CML268      | 26.47 | 90.13  | 13.54  | 34.05  | 41.05 |
| 35855       | 13.37 | 49.05  | 39.74  | 62.05  | 41.05 |
| L6201       | 4.94  | 7.83   | 142.05 | 11.73  | 41.64 |
| HuangC      | 4.26  | 5.21   | 155.45 | 2.76   | 41.92 |
| MH9         | 19.01 | 9.16   | 24.23  | 116.01 | 42.10 |
| V37         | 9.01  | 90.12  | 8.17   | 61.15  | 42.11 |
| P953        | 40.46 | 25.58  | 40.46  | 68.54  | 43.76 |
| PB80        | 7.12  | 6.13   | 102.02 | 64.52  | 44.95 |
| 06WAM110    | 2.64  | 22.15  | 82.05  | 75.98  | 45.71 |
| Mo17        | 3.18  | 1.18   | 8.01   | 171.15 | 45.88 |
| SAM31152A   | 2.41  | 44.15  | 81.02  | 57.42  | 46.25 |
| Nan381      | 22.05 | 5.06   | 105.11 | 54.22  | 46.61 |
| CML451      | 1.08  | 58.50  | 20.34  | 107.15 | 46.77 |
| SW01D1058-7 | 4.02  | 30.00  | 147.05 | 6.13   | 46.80 |
| CN9802      | 9.08  | 63.17  | 23.44  | 94.35  | 47.51 |
| 08WSC179    | 0.18  | 0.23   | 0.33   | 192.50 | 48.31 |
| HZ127-7     | 40.05 | 140.23 | 5.71   | 10.05  | 49.01 |
| 03FLUSA10   | 8.11  | 21.43  | 109.05 | 60.91  | 49.88 |
| BML1234     | 1.12  | 11.01  | 34.05  | 155.13 | 50.33 |
| 871         | 3.02  | 27.34  | 140.57 | 32.51  | 50.86 |
| F06         | 3.22  | 6.07   | 9.24   | 185.13 | 50.92 |
| CLRCY034    | 6.64  | 5.14   | 18.02  | 175.11 | 51.23 |
| ZH64        | 6.60  | 52.54  | 87.75  | 63.63  | 52.63 |
| Ji992       | 0.00  | 6.15   | 9.09   | 200.47 | 53.93 |

|              |        |        |        |        |        |
|--------------|--------|--------|--------|--------|--------|
| BML1256      | 11.09  | 24.23  | 52.05  | 130.25 | 54.41  |
| En1824       | 21.23  | 56.05  | 21.10  | 120.62 | 54.75  |
| Y1038        | 1.58   | 1.22   | 45.94  | 170.55 | 54.82  |
| CML447       | 25.12  | 150.26 | 8.18   | 38.03  | 55.40  |
| SW01D1031-14 | 17.13  | 40.05  | 124.16 | 45.35  | 56.67  |
| SCML103      | 5.06   | 5.10   | 27.11  | 190.36 | 56.91  |
| 81565        | 0.65   | 5.47   | 23.21  | 198.85 | 57.05  |
| Q78          | 10.64  | 0.44   | 166.58 | 55.26  | 58.23  |
| W8071        | 15.03  | 105.05 | 78.23  | 38.04  | 59.09  |
| LZM05-1-1    | 6.02   | 4.02   | 135.36 | 94.57  | 59.99  |
| Y1216        | 0.67   | 8.47   | 3.09   | 234.58 | 61.70  |
| 618          | 11.47  | 6.19   | 51.46  | 182.05 | 62.79  |
| JS0251       | 13.36  | 24.26  | 6.13   | 220.36 | 66.03  |
| Shen135      | 1.18   | 2.37   | 203.40 | 60.53  | 66.87  |
| 98WV9        | 60.75  | 30.47  | 15.47  | 164.52 | 67.80  |
| LLF-08       | 0.27   | 6.68   | 167.52 | 102.53 | 69.25  |
| B151         | 0.44   | 4.58   | 126.54 | 147.05 | 69.65  |
| Liao147-8    | 6.23   | 73.05  | 37.53  | 162.51 | 69.83  |
| QBII-1       | 6.85   | 50.62  | 147.12 | 77.51  | 70.53  |
| ZD0502-23111 | 4.07   | 137.52 | 13.54  | 130.75 | 71.47  |
| CD30M        | 7.06   | 55.15  | 84.53  | 142.53 | 72.32  |
| Y1217        | 1.95   | 31.15  | 205.81 | 60.23  | 74.79  |
| 9782         | 21.92  | 7.05   | 190.15 | 80.15  | 74.82  |
| PHW52        | 72.74  | 27.93  | 60.57  | 147.94 | 77.30  |
| 2369         | 2.02   | 60.36  | 27.37  | 228.74 | 79.62  |
| M89          | 12.03  | 65.64  | 0.61   | 241.15 | 79.86  |
| P138         | 1.08   | 37.52  | 182.58 | 115.74 | 84.23  |
| Y1018        | 14.36  | 30.46  | 217.59 | 79.52  | 85.48  |
| F19          | 6.93   | 148.25 | 96.82  | 90.01  | 85.50  |
| TLL-1        | 48.27  | 126.53 | 8.07   | 161.05 | 85.98  |
| Yi99-19      | 0.41   | 12.27  | 324.95 | 15.15  | 88.20  |
| 08-641       | 5.12   | 34.15  | 272.17 | 48.73  | 90.04  |
| 9HT1804      | 0.00   | 18.09  | 0.62   | 364.95 | 95.92  |
| ML1120       | 79.52  | 175.83 | 10.35  | 130.62 | 99.08  |
| Zheng58      | 0.00   | 14.04  | 43.05  | 356.42 | 103.38 |
| Y1111        | 9.14   | 30.15  | 344.38 | 42.85  | 106.63 |
| HL5054       | 0.81   | 61.15  | 350.26 | 16.83  | 107.26 |
| Liao3053     | 1.15   | 14.07  | 152.05 | 262.55 | 107.46 |
| Y1032R       | 3.08   | 39.37  | 19.58  | 375.53 | 109.39 |
| Jiao51       | 9.47   | 64.51  | 18.11  | 346.54 | 109.66 |
| 87916W       | 79.05  | 112.59 | 34.26  | 216.93 | 110.71 |
| Y1022        | 37.52  | 18.16  | 94.36  | 345.95 | 124.00 |
| 07G83        | 1.11   | 192.05 | 196.74 | 118.26 | 127.04 |
| TY30331-2    | 6.25   | 146.83 | 38.14  | 320.63 | 127.96 |
| Dan4245      | 15.17  | 94.85  | 112.25 | 300.74 | 130.75 |
| Y1032W       | 13.05  | 154.53 | 57.14  | 315.84 | 135.14 |
| 66781        | 1.02   | 49.50  | 267.53 | 250.18 | 142.06 |
| CML282       | 49.14  | 43.26  | 180.64 | 316.25 | 147.32 |
| W30          | 144.03 | 51.27  | 237.64 | 200.21 | 158.29 |

|          |       |        |         |        |        |
|----------|-------|--------|---------|--------|--------|
| WZ-1     | 0.21  | 154.42 | 231.74  | 276.23 | 165.65 |
| CA1108   | 2.25  | 248.53 | 155.63  | 265.25 | 167.92 |
| CIMMYT-1 | 5.03  | 31.15  | 42.38   | 604.51 | 170.77 |
| TS6278   | 0.00  | 18.64  | 60.95   | 610.23 | 172.46 |
| JH59     | 0.28  | 152.15 | 420.37  | 148.74 | 180.39 |
| 4866     | 34.85 | 632.74 | 27.07   | 57.36  | 188.01 |
| CLWN201  | 0.14  | 69.26  | 12.52   | 682.57 | 191.12 |
| Jing07-4 | 32.64 | 51.95  | 14.43   | 665.74 | 191.19 |
| 08WSC200 | 5.80  | 640.04 | 124.14  | 19.56  | 197.39 |
| MX714    | 6.36  | 117.25 | 224.08  | 465.35 | 203.26 |
| JF52-3   | 5.02  | 45.67  | 390.01  | 374.20 | 203.73 |
| GCML157  | 0.12  | 114.96 | 204.16  | 520.53 | 209.94 |
| Chuan273 | 0.91  | 10.81  | 9.05    | 847.02 | 216.95 |
| 4379     | 1.02  | 160.01 | 486.37  | 250.14 | 224.39 |
| 08WSC166 | 23.09 | 82.56  | 1089.56 | 180.23 | 343.86 |

---

Supplementary Figure S1

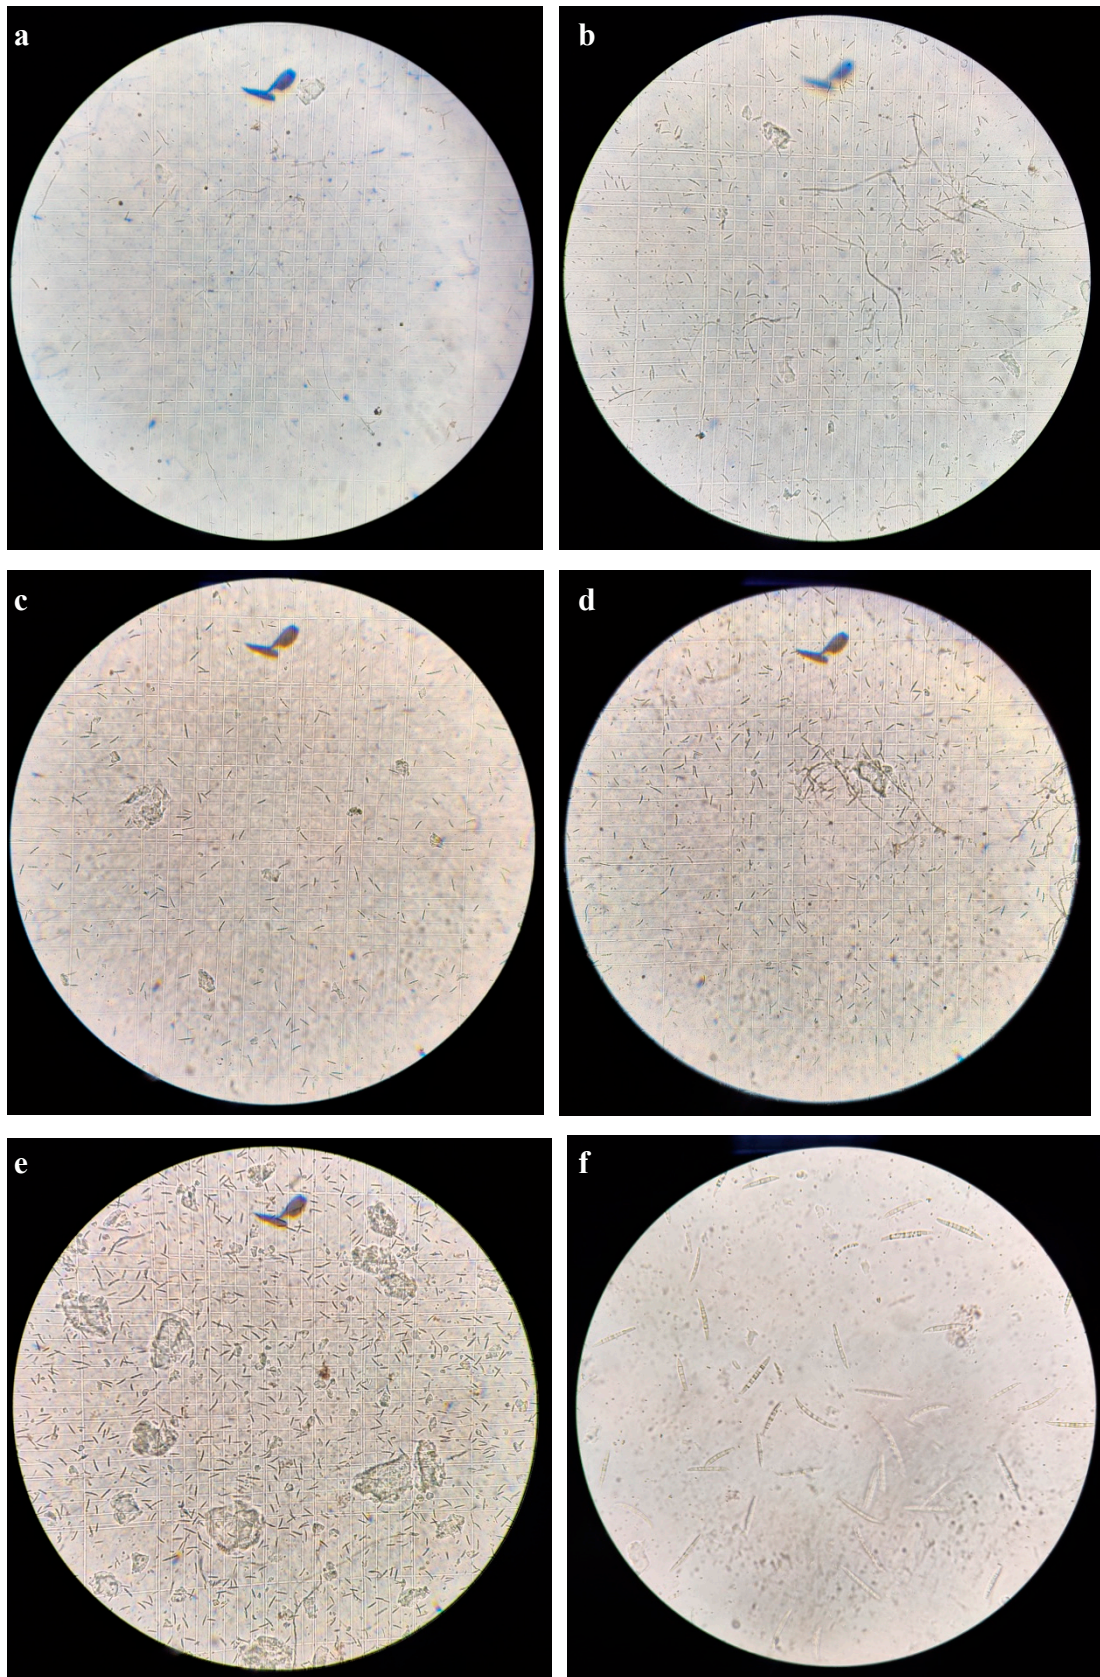



**Supplementary Figure S1.** Macroconidia characters of *Fusarium graminearum* at different time points. (a) 0 day post-inoculation (dpi). (b) 7 dpi. (c) 14 dpi. (d) 21 dpi. (e) 28 dpi. (f) Larger version of *Fusarium graminearum* macroconidia.
